# Supplementary material for: Diversity of tRNA Clusters in the Chloroviruses
Source: Viruses. 2020 Oct 16;12(10):1173. doi: 10.3390/v12101173 (PMC7589089; doi:10.3390/v12101173)
Supplement: Supplementary file 1 [file viruses-12-01173-s001.pdf]

# Diversity of tRNA Clusters in the Chloroviruses

Garry A. Duncan <sup>1</sup>, David D. Dunigan <sup>1,2</sup> and James L. Van Etten <sup>1,2,\*</sup>

<sup>1</sup> Nebraska Center for Virology, University of Nebraska-Lincoln, Lincoln, NE 68583-0900, USA; gduncan2@unl.edu (G.A.D.); ddunigan2@unl.edu (D.D.D.); jvanetten1@unl.edu (J.L.V.E.)

<sup>2</sup> Department of Plant Pathology, University of Nebraska-Lincoln, Lincoln, NE 68583-0833, USA

\* Correspondence: jvanetten1@unl.edu; Tel.: (+1)-402-472-3168

## Supplementary Material

**Table S1.** Accession numbers for 41 chloroviruses grouped into three clades that have three different hosts.

| Chloro-viruses | Accession number | Sampling Location <sup>1</sup> | Chlorovirus group |
|----------------|------------------|--------------------------------|-------------------|
| MA-1E          | JX997173         | Massachusetts, USA             | NC64A             |
| CvsA1          | JX997165         | Sawara, Japan                  | NC64A             |
| CviKI          | JX997162         | Kyoto, Japan                   | NC64A             |
| KS1B           | JX997171         | Kansas, USA                    | NC64A             |
| PBCV-1         | JF411744.1       | North Carolina, USA            | NC64A             |
| IL-3A          | JX997169         | Illinois, USA                  | NC64A             |
| MA-1D          | JX997172         | Massachusetts, USA             | NC64A             |
| NE-JV-4        | JX997179         | Nebraska, USA                  | NC64A             |
| AN69C          | JX997153         | Canberra, Australia            | NC64A             |
| NY-2B          | JX997182         | New York state, USA            | NC64A             |
| IL-5-2s1       | JX997170         | Illinois, USA                  | NC64A             |
| NY-2A          | DQ491002.1       | New York state, USA            | NC64A             |
| NYs-1          | JX997183         | New York state, USA            | NC64A             |
| AR158          | DQ491003.2       | Buenos Aires, Argentina        | NC64A             |
| Fr5L           | JX997167         | France                         | Pbi               |
| CZ-2           | JX997166         | Czech Republica                | Pbi               |
| MT325          | DQ491001.1       | Montana, USA                   | Pbi               |
| Can18-4        | JX997157         | Canada                         | Pbi               |
| CVB-1          | JX997160         | Berlin, Germany                | Pbi               |
| FR483          | DQ890022.1       | France                         | Pbi               |
| CVG-1          | JX997161         | Göttingen, Germany             | Pbi               |
| CVR-1          | JX997164         | Rauschenberg, Germany          | Pbi               |
| CVA-1          | JX997159         | Amönau, Germany                | Pbi               |
| AP110          | JX997154         | Unknown                        | Pbi               |
| CVM-1          | JX997163         | Marburg, Germany               | Pbi               |
| NW665.2        | JX997181         | Norway                         | Pbi               |
| OR0704.2.2     | JX997184         | Oregon, USA                    | Pbi               |
| NE-JV-1        | JX997176         | Nebraska, USA                  | Pbi               |
| OR0704.3       | JX997185         | Oregon, USA                    | SAG               |
| Can0610SP      | JX997156         | British Columbia, Canada       | SAG               |
| NE-JV-2        | JX997177         | Nebraska, USA                  | SAG               |
| NE-JV-3        | JX997178         | Nebraska, USA                  | SAG               |
| ATCV-1         | EF101928         | Stuttgart, Germany             | SAG               |
| WI0606         | JX997187         | Wisconsin, USA                 | SAG               |
| MO0605SPH      | JX997175         | Missouri, USA                  | SAG               |
| GM0701.1       | JX997168         | Guatemala                      | SAG               |
| Br0604L        | JX997155         | SaoPaulo, Brazil               | SAG               |
| TN603.4.2      | JX997186         | Tennessee, USA                 | SAG               |
| Canal-1        | JX997158         | Nebraska, USA                  | SAG               |

|          |          |                |     |
|----------|----------|----------------|-----|
| MN0810.1 | JX997174 | Minnesota, USA | SAG |
| NTS-1    | JX997180 | Nebraska, USA  | SAG |

<sup>1</sup>Sampling locations obtained from Jeanniard et al. [13].

**Table S2.** NC64A viruses: 5' and 3' genes closest to the tRNA gene cluster.

| NC64A virus | 5' upstream<br>(~1068 nt) | 5' upstream<br>(~291 nt) | tRNA cluster | 3' downstream<br>(~1299 nt) | 3' downstream<br>(~1140) | 3' downstream <sup>1</sup><br>(~1191 nt) |
|-------------|---------------------------|--------------------------|--------------|-----------------------------|--------------------------|------------------------------------------|
| MA-1E       | 390L                      | <b>393R</b>              |              |                             | <b>396R</b>              | 407L                                     |
| CvsA1       | 361L                      | <b>364R</b>              |              |                             | <b>368R</b>              | 380L                                     |
| CviKI       | 353L                      | <b>356R</b>              |              |                             | <b>359R</b>              | 370L                                     |
| KS1B        | 310L                      | <b>311R</b>              |              |                             |                          | <b>314L</b>                              |
| PBCV-1      | A328L                     | <b>A329R</b>             |              | <b>A330R</b>                |                          | A333L                                    |
| IL-3A       | 368L                      | <b>369R</b>              |              | <b>371R</b>                 | 375R                     | 386L                                     |
| MA-1D       | <b>347L</b>               |                          |              |                             | <b>355R</b>              | 367L                                     |
| NE-JV-4     | 384L                      | <b>385R</b>              |              | <b>388R</b>                 |                          | 390L                                     |
| AN69C       | 377L                      | <b>378R</b>              |              | <b>380R</b>                 | 384R                     | 395L                                     |
| NY-2B       | <b>465L</b>               |                          |              |                             | 473R                     | 484L                                     |
| IL-5-2s1    | <b>484L</b>               |                          |              |                             | <b>492R</b>              | 503/506L                                 |
| NY-2A       | B458L                     | <b>B460R</b>             |              |                             | B465R                    | B480L                                    |
| NYs-1       | <b>474L</b>               |                          |              |                             | <b>483R</b>              | 495L                                     |
| AR158       | <b>C406L</b>              |                          |              |                             | C413R                    | C423L                                    |

The genes in each column are orthologs to one another; approximate nt length of each ortholog is noted in parentheses. The genes in bold font are the closest 5' and 3' genes for each of the 14 NC64A viruses. There is a common tRNA cluster location among the NC64A viruses. Red column heading and column are used to indicate the position of the tRNA clusters in the viral genomes relative to the surrounding non-tRNA genes.

<sup>1</sup>This column is included because the KS1B gene 314L is the closest 3' gene. Orthologs of 314L are present in the other NC64A, but they are further downstream.

**Table S3.** SAG viruses: 5' and 3' genes closest to the tRNA gene cluster.

| SAG viruses | 5' upstream<br>(~285 nt) | 5' upstream<br>(~837 nt) | tRNA cluster | 3' downstream<br>(~1041 nt) | 3' downstream<br>(~3,774 nt) |
|-------------|--------------------------|--------------------------|--------------|-----------------------------|------------------------------|
| OR0704.3    | 307R                     |                          |              |                             | 301L                         |
| Can0610SP   | 308R                     |                          |              | 309R                        | 313L                         |
| NE-JV-2     | 338R                     | 339R                     |              |                             | 341L                         |
| NE-JV-3     | 301R                     |                          |              |                             | 303L                         |
| ATCV-1      | Z254R                    |                          |              |                             | Z257L                        |
| WI0606      | 329R                     |                          |              |                             | 332L                         |
| MO0605SPH   | 313R                     |                          |              |                             | 316L                         |
| GM0701.1    | 305R                     |                          |              | 309R                        | 312L                         |
| Br0604L     | 306R                     |                          |              |                             | 308L                         |
| TN603.4.2   | 303R                     |                          |              |                             | 307L                         |
| Canal-1     | 302R                     |                          |              |                             | 304L                         |
| MN0810.1    | 337R                     |                          |              |                             | 340L                         |
| NTS-1       | 345R                     |                          |              |                             | 351L                         |

The genes in each column are orthologs to one another; approximate nt length of each ortholog is noted in parentheses. The genes in bold font are the closest 5' and 3' genes for each of the 13 SAG viruses. There is a common tRNA cluster location among the SAG viruses. Red column heading and column are used to indicate the position of the tRNA clusters in the viral genomes relative to the surrounding non-tRNA genes.

Table S4. Pbi viruses: 5' and 3' genes closest to the tRNA gene cluster.

| Pbi viruses | 5' upstream<br>(~726 nt) | 5' upstream<br>(~270 nt) | 5' upstream<br>(870 nt) | 5' upstream<br>(267 nt) | tRNA<br>cluster | 3' downstream<br>(789 nt) | 3' downstream<br>(~297 nt) <sup>1</sup> | 3' downstream<br>(~420 nt) | 3' downstream<br>(~552 nt) |
|-------------|--------------------------|--------------------------|-------------------------|-------------------------|-----------------|---------------------------|-----------------------------------------|----------------------------|----------------------------|
| Fr5L        | 393R                     | 397R                     |                         |                         |                 |                           |                                         | 401L                       |                            |
| CZ-2        | 352R                     | 355R                     |                         |                         |                 |                           |                                         | 358L                       |                            |
| MT325       | M3422R                   |                          |                         |                         |                 |                           | M344L                                   |                            |                            |
| Can18-4     | 414R                     |                          |                         |                         | 418R            |                           | 419L                                    | 422L                       |                            |
| CVB-1       | 406R                     |                          |                         |                         | 408R            |                           | 411L                                    | 413L                       |                            |
| FR483       | N351R                    |                          |                         |                         |                 |                           | N345L                                   | n356L                      |                            |
| CVG-1       | 385R                     |                          |                         |                         |                 |                           | 390L                                    | 392L                       |                            |
| CVR-1       | 400R                     |                          |                         |                         |                 |                           | 404L                                    | 406L                       |                            |
| CVA-1       | 392R                     |                          |                         |                         |                 |                           | 396L                                    | 398L                       |                            |
| AP110A      | 403R                     |                          |                         |                         |                 | 407R                      | 411L                                    | 413L                       |                            |
| CVM-1       | 421R                     |                          |                         |                         |                 |                           | 425L                                    | 428L                       |                            |
| NW665.2     | 375R                     |                          |                         |                         | 378R            |                           | 381L                                    | 383L                       |                            |
| OR0704.2.2  | 349R                     | 352R                     | 353R                    |                         |                 |                           |                                         | 356L                       |                            |
| NE-JV-1     |                          |                          |                         | 683R                    | 688R            |                           |                                         |                            | 690L                       |

The genes in each column are orthologs to one another; approximate nt length of each ortholog is noted in parentheses. There is a common tRNA cluster location among the Pbi viruses, with the exception of NE-JV-1. Several viruses have protein-encoding genes within the tRNA cluster (blue font), which are not orthologous to one another. The HGT events that led to these gene insertions resulted in the loss of one or more tRNA genes in each case. Red column heading and column are used to indicate the position of the tRNA clusters in the viral genomes relative to the surrounding non-tRNA genes.

<sup>1</sup>MT325 and FR483 have longer genes (525 nt) but the core of 297 is present with high identity

|            | Box A       |             |                                             | Box B        |             |  |
|------------|-------------|-------------|---------------------------------------------|--------------|-------------|--|
|            | TRGYNNARNNG |             |                                             | RGTTCRANTCC  |             |  |
| ATCV1:     | GCTCCCA     | TAGCTCAGTTG | GTTAGAGCGCGACTTT <b>AGT</b> AAGGTCGAGGTCCGT | GGTTCGAATCC  | GCGTGGGAGCA |  |
| WI0606:    | GCTCCCA     | TAGCTCAGTTG | GTTAGAGCGCGACTTT <b>AGT</b> AAGGTCGAGGTCCGT | GGTTCGAATCC  | GCGTGGGAGCA |  |
| OR0704.3:  | GCTCCCA     | TAGCTCAGTTG | GTTAGAGCGCGACTTT <b>AGT</b> AAGGTCGAGGTCCGT | GGTTCGAATCC  | GCGTGGGAGCA |  |
| NTS-1:     | GCTCCCA     | TAGCTCAGTTG | GTTAGAGCGCGACTTT <b>AGT</b> AAGGTCGAGGTCCGT | GGTTCGAATCC  | GCGTGGGAGCA |  |
| NE-JV-3:   | GCTCCCA     | TAGCTCAGTTG | GTTAGAGCGCGACTTT <b>AGT</b> AAGGTCGAGGTCCGT | GGTTCGAATCC  | GCGTGGGAGCA |  |
| NE-JV-2:   | GCTCCCA     | TAGCTCAGTTG | GTTAGAGCGCGACTTT <b>AGT</b> AAGGTCGAGGTCCGT | GGTTCGAATCC  | GCGTGGGAGCA |  |
| MO0605SH:  | GCTCCCA     | TAGCTCAGTTG | GTTAGAGCGCGACTTT <b>AGT</b> AAGGTCGAGGTCCGT | GGTTCGAATCC  | GCGTGGGAGCA |  |
| Can0610SP: | GCTCCCA     | TAGCTCAGTTG | GTTAGAGCGCGACTTT <b>AGT</b> AAGGTCGAGGTCCGT | GGTTCGAATCC  | GCGTGGGAGCA |  |
| TN703.4.2: | GCTCCCA     | TAGCTCAGATG | GTTAGAGCGCGACTTT <b>AGT</b> AAAGTCGAGGTCCGT | GGTTCGAATCC  | GCGTGGGAGCA |  |
| GM0701.1:  | GCTCCCA     | TAGCTCAGATG | GTTAGAGCGCGACTTT <b>AGT</b> AAAGTCGAGGTCCGT | GGTTCGAATCC  | GCGTGGGAGCA |  |
| Br0604L:   | GCTCCCA     | TAGCTCAGATG | GTTGGAGCGCGACTTT <b>AGT</b> AAGATCGAGGTCCGT | GGTTTGAATCC  | GCGTGGGAGCA |  |
| MN0810.1:  | GCTCCTA     | TAGCTCAGTGA | --AGAGCGCGACTTT <b>AGT</b> AAGGTCGAGGCCCGT  | GGTTCGACCCC  | ACGTGGGAGCA |  |
| Canal-1:   | GCTCCTA     | TAGCTCAGCGG | --TAGAGCGCGACTTT <b>AGT</b> AAGGTCGAGGTCCAT | GGTTC--AACCC | GTGTGGGAGCA |  |

**Figure S1.** Alignment of tRNA<sup>Thr</sup> genes from 13 SAG viruses. The two rectangles, known as Box A and B, are recognized by transcription factor IIIC, critical to the eventual attachment of RNA polymerase III. The eukaryotic consensus sequences reported by Diebel et al. [28] are above the rectangles. The 5' to 3' anticodon is identified in bold font. Invariant bases for Box A and B are highly conserved. The tRNA<sup>Thr</sup> genes for the SAG viruses are orphaned from the tRNA clusters, but their high level of sequence identity suggests that they are transcribed by RNA polymerase III independent of their respective tRNA clusters.

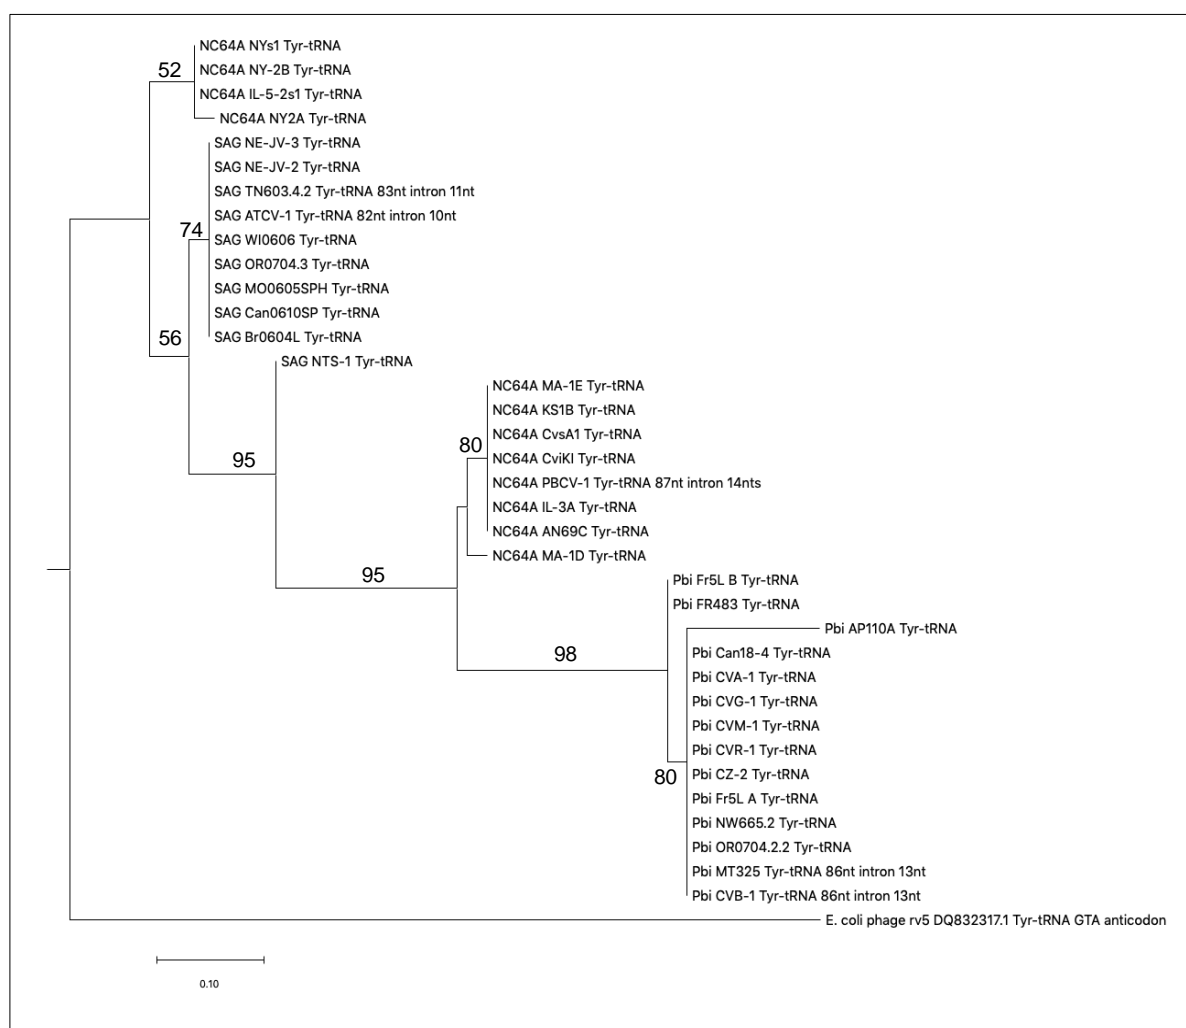

**Figure S2.** Phylogenetic tree of tRNA<sup>Tyr</sup> genes from 35 chloroviruses representing all three clades, NC64A, Pbi and SAG. Six chloroviruses lacked the tRNA<sup>Tyr</sup> gene. The tRNA<sup>Tyr</sup> gene from *E. coli* phage rv5 was used as the outgroup. One subclade of NC64A viruses is more similar to SAG viruses, while the other subclade of NC64A viruses is more similar to the Pbi viruses. Bootstrap values greater than 50 are reported. The sequences were aligned with MUSCLE and the trees were constructed using the maximum.

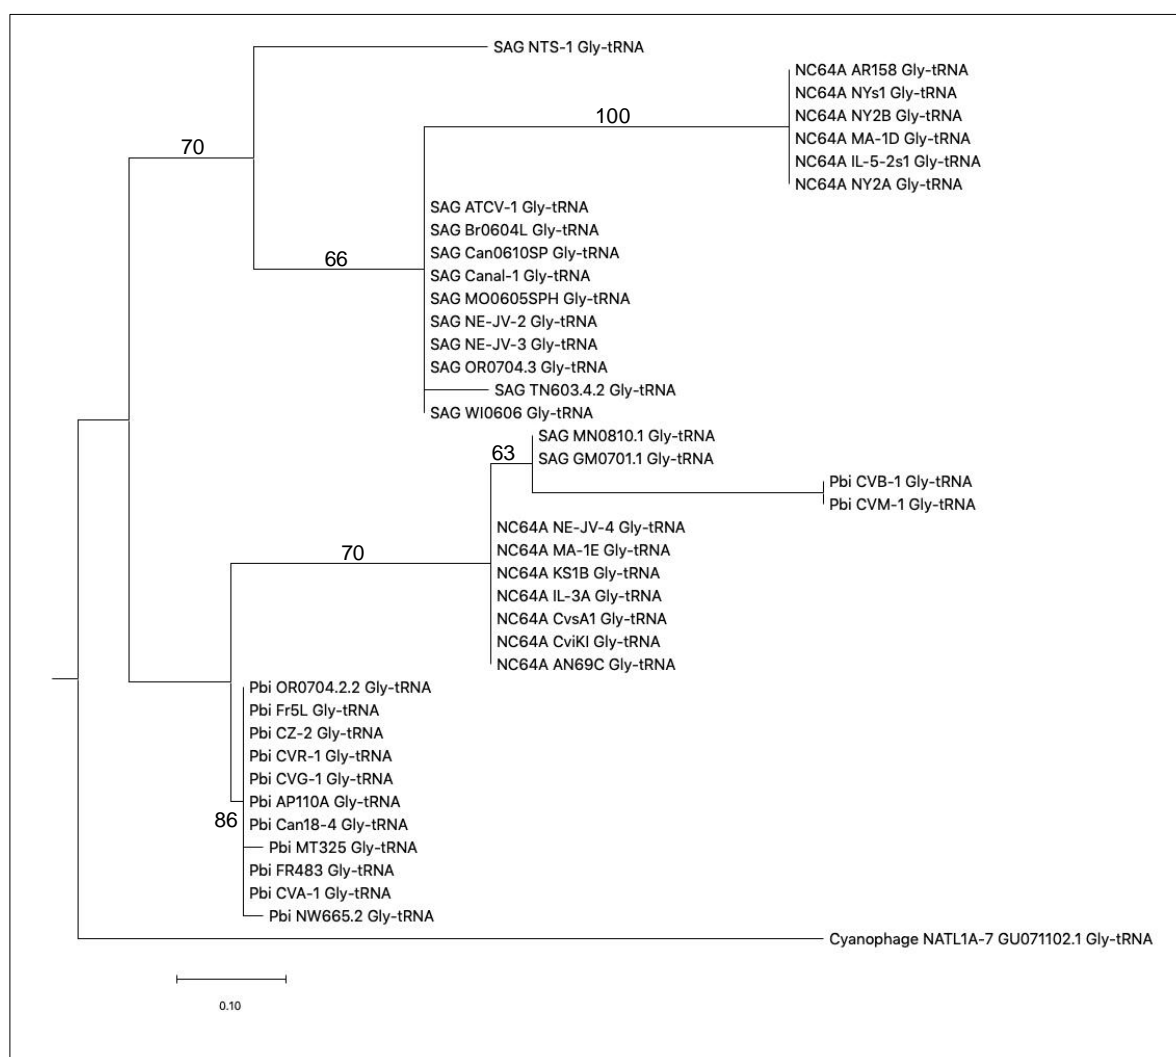

**Figure S3.** Phylogenetic tree of tRNA<sup>Gly</sup> genes from 39 chloroviruses representing all three clades, NC64A, Pbi and SAG. Two chloroviruses lacked the tRNA<sup>Gly</sup> gene. The tRNA<sup>Gly</sup> gene from cyanophage NATL1A was used as the outgroup. One NC64A subclade is more similar to SAG viruses than the other subclade of NC64A viruses. Two SAG viruses and two Pbi viruses are more similar to a second subclade of NC64A than they are to viruses in their own clades. Bootstrap values greater than 50 are reported. The sequences were aligned with MUSCLE and the trees were constructed using the maximum likelihood algorithm.

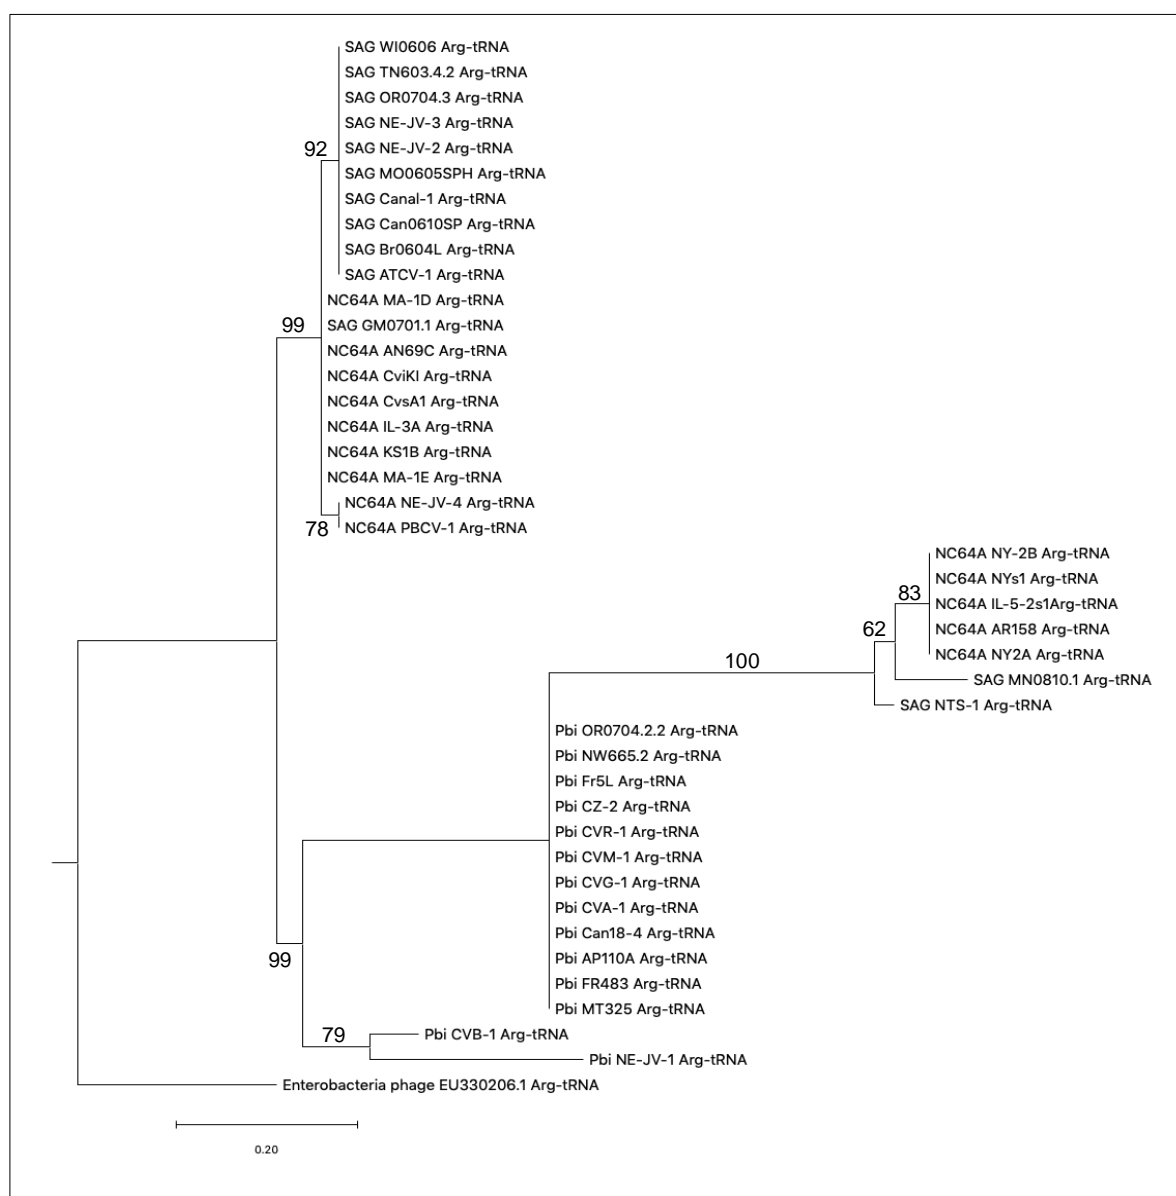

**Figure S4.** Phylogenetic tree of tRNA<sup>Arg</sup> genes from all 41 chloroviruses representing all three clades, NC64A, Pbi and SAG. The tRNA<sup>Arg</sup> gene from enterobacteria phage EU330206.1 was used as the outgroup. One NC64A subclade and two SAG viruses are more similar to Pbi viruses than they are to viruses in their own clade. Bootstrap values greater than 50 are reported. The sequences were aligned with MUSCLE and the trees were constructed using the maximum likelihood algorithm.

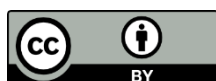

© 2020 by the authors. Submitted for possible open access publication under the terms and conditions of the Creative Commons Attribution (CC BY) license (<http://creativecommons.org/licenses/by/4.0/>).
